# Supplementary material for: Nucleophosmin/B23 is a negative regulator of estrogen receptor α expression via AP2γ in endometrial cancer cells
Source: PubMed Central journal article supplement (PMC5312367; doi:10.18632/oncotarget.11048), 2016-08-04
Supplement: oncotarget-07-60038-s001.pdf [file oncotarget-07-60038-s001.pdf]

## Nucleophosmin/B23 is a negative regulator of estrogen receptor $\alpha$ expression via AP2 $\gamma$ in endometrial cancer cells

### SUPPLEMENTARY FIGURES

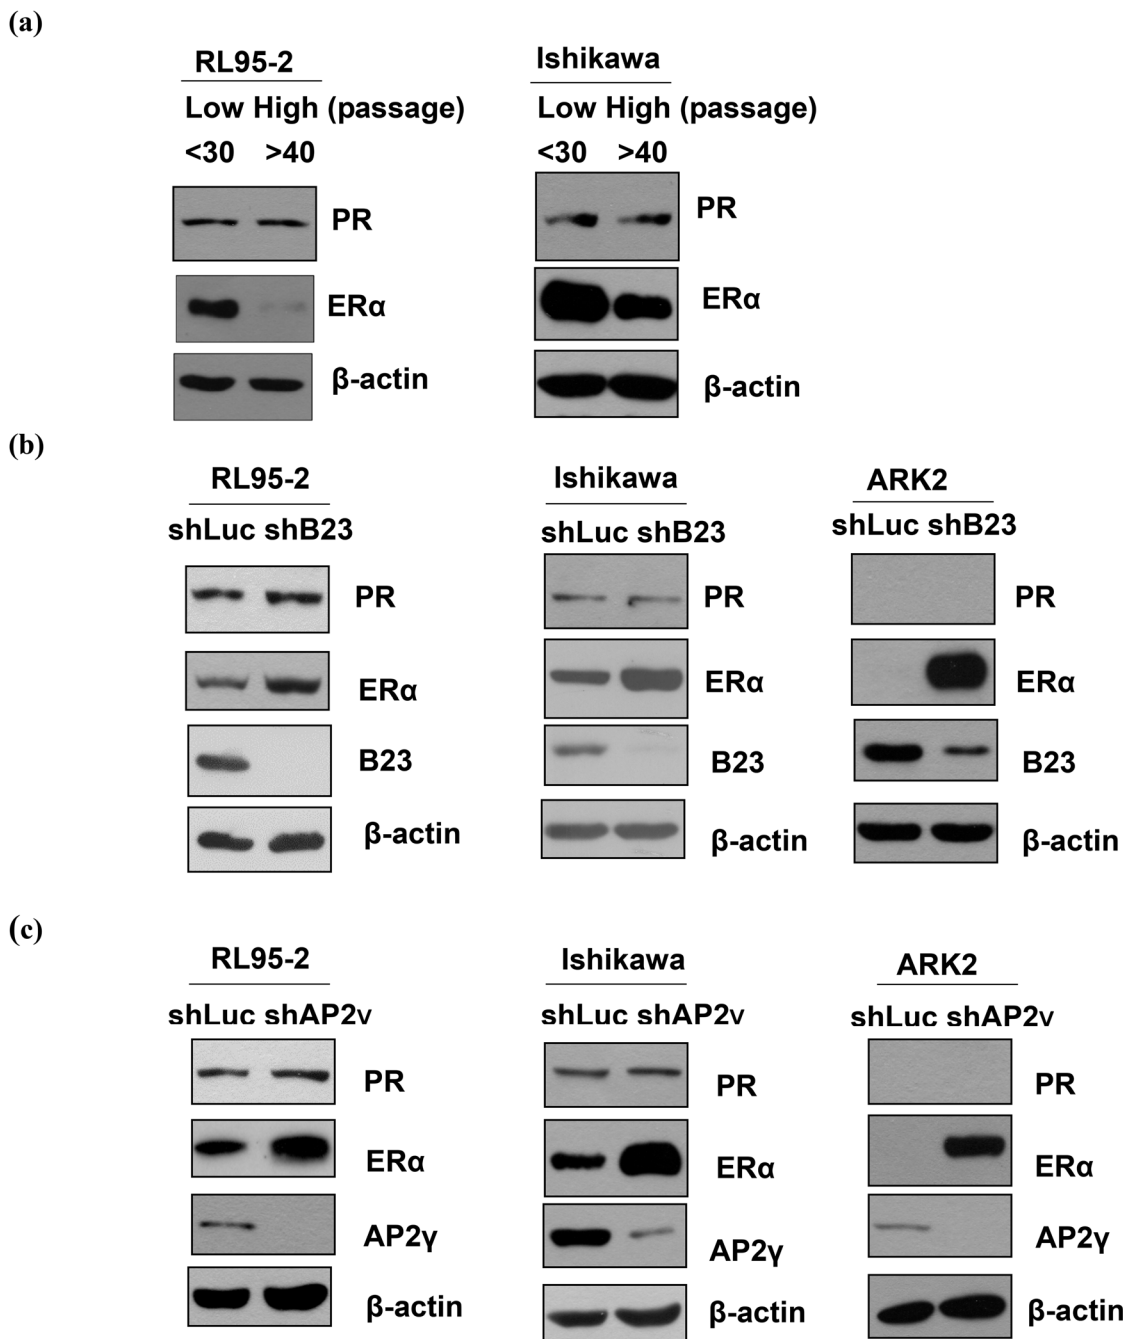

**Supplementary Figure S1: PR expression did not affect by different passage or shRNA for B23 and AP2 $\gamma$ .** a. RL95-2 and Ishikawa endometrial cancer cells with early passage (n < 30) and late passage (n > 40) were subcultured in medium containing phenol-red every 2-3 days. Equal amounts of protein lysates were separated by SDS-PAGE and subjected to immunoblotting with antibodies for PR, ER $\alpha$ , AP2 $\gamma$ , B23 and  $\beta$ -actin. b, c. RL95-2, Ishikawa cells or ARK2 with shLuc, shB23 and shAP2 $\gamma$  stable lines were harvested, and equal amounts of protein lysates were separated by SDS-PAGE and subjected to immunoblotting with antibodies for PR, ER $\alpha$ , AP2 $\gamma$ , B23 and  $\beta$ -actin.  $\beta$ -actin was used to confirm equal protein inputs in all lanes.

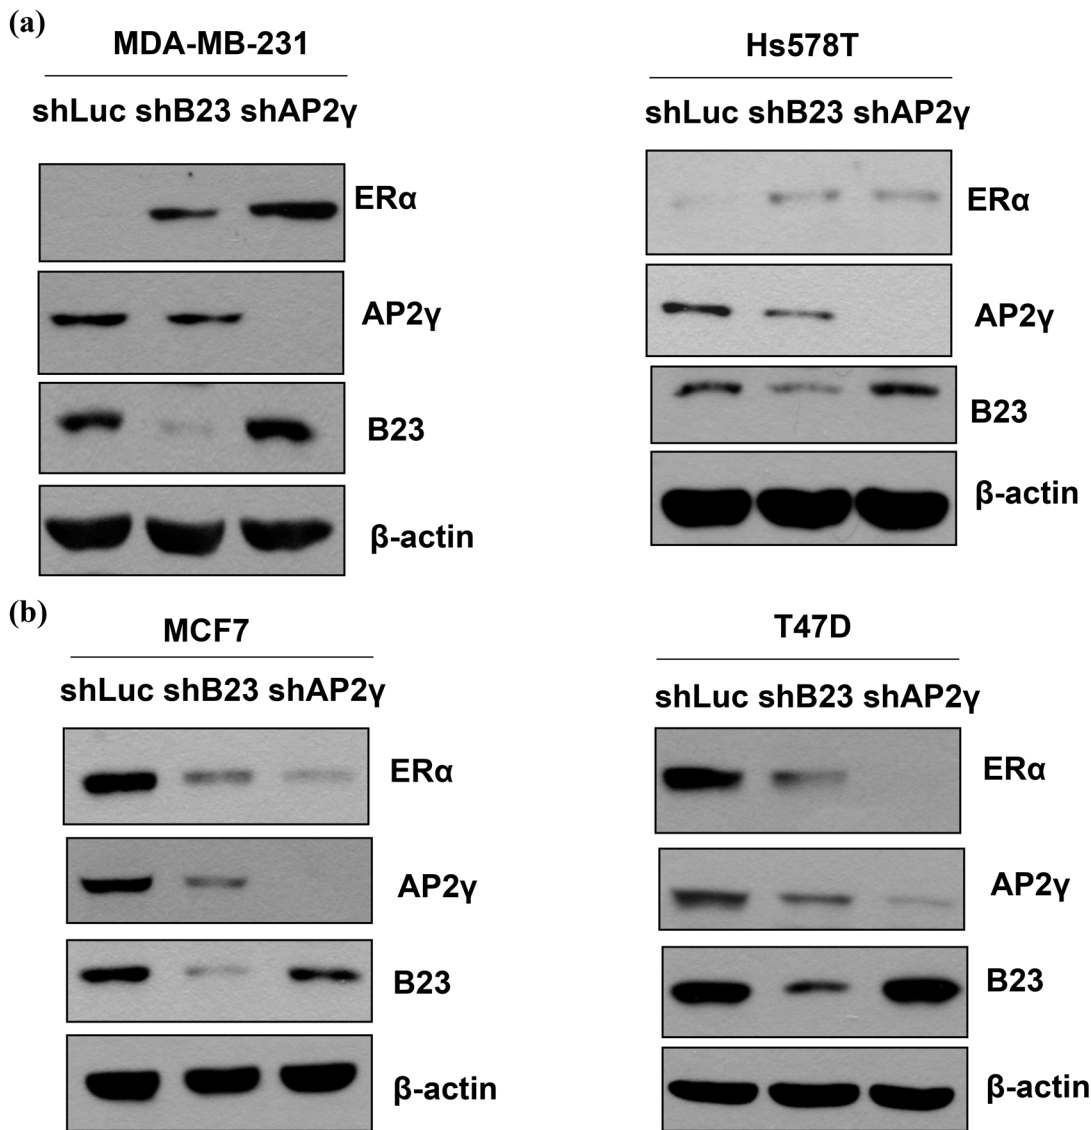

**Supplementary Figure S2: B23 and AP2γ play different roles in ERα expression in various breast cancer cells.** a. ERα-negative MDA-MB-231 and Hs578T breast cancer cells were transiently transfected with shLuc, shB23 or shAP2γ for 72 h and were immunoblotted with the indicated antibodies. b. ERα-positive MCF7 and T47D breast cancer cells were transiently transfected with shLuc, shB23 or shAP2γ for 72 h and were immunoblotted with the indicated antibodies. β-actin was used to confirm equal protein inputs in all lanes.

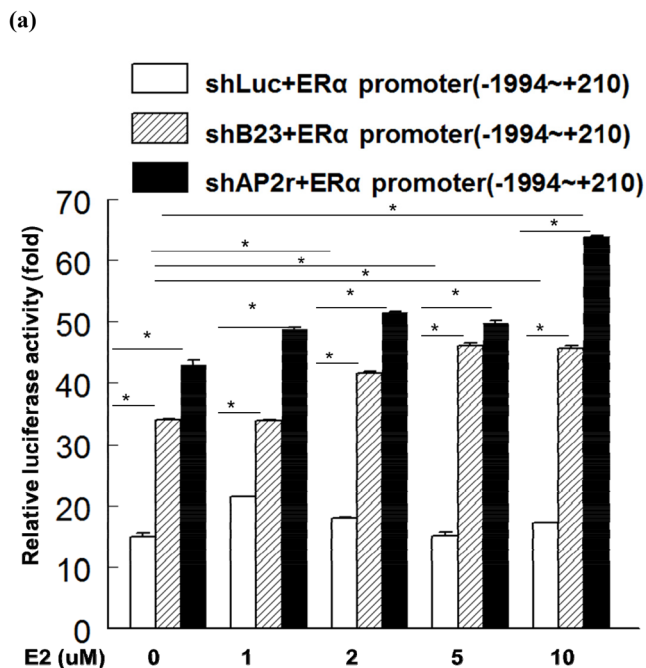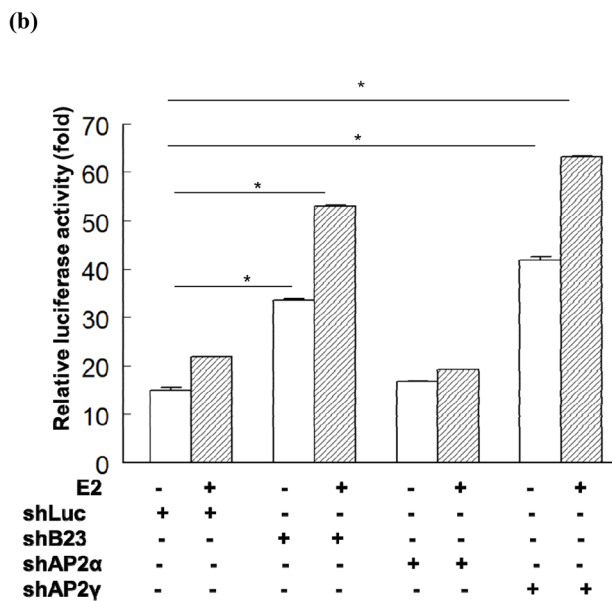

**Supplementary Figure S3: Knockdown B23 or AP2 $\gamma$  enhances sensitivity of the ER $\alpha$  promoter activity to estradiol. a.**

ARK2 cells were transiently co-transfected with the ER $\alpha$  promoter and shLuc, shB23, shAP2 $\gamma$  for 24h and treated with/without different dose of E2 for additional 24h. Herein, shAP2 $\alpha$  was used as a contrast to demonstrate the effect of knocking down AP2 $\gamma$ . **b.** ARK2 cells were transiently co-transfected with the ER $\alpha$  promoter and shLuc, shB23, shAP2 $\alpha$ , shAP2 $\gamma$  for 24h and treated with/without E2 (1uM) for additional 24h. Protein lysates were then assayed for luciferase and  $\beta$ -galactosidase activities. An approximate 15-fold increase in the ER $\alpha$ -promoter (-1994~+210) reporter activity was observed when compared with the empty pGL3-promoter vector, where the activity was set as 1. The relative promoter activity was normalized to that of  $\beta$ -galactosidase. \*  $P < 0.05$  compared with controls.

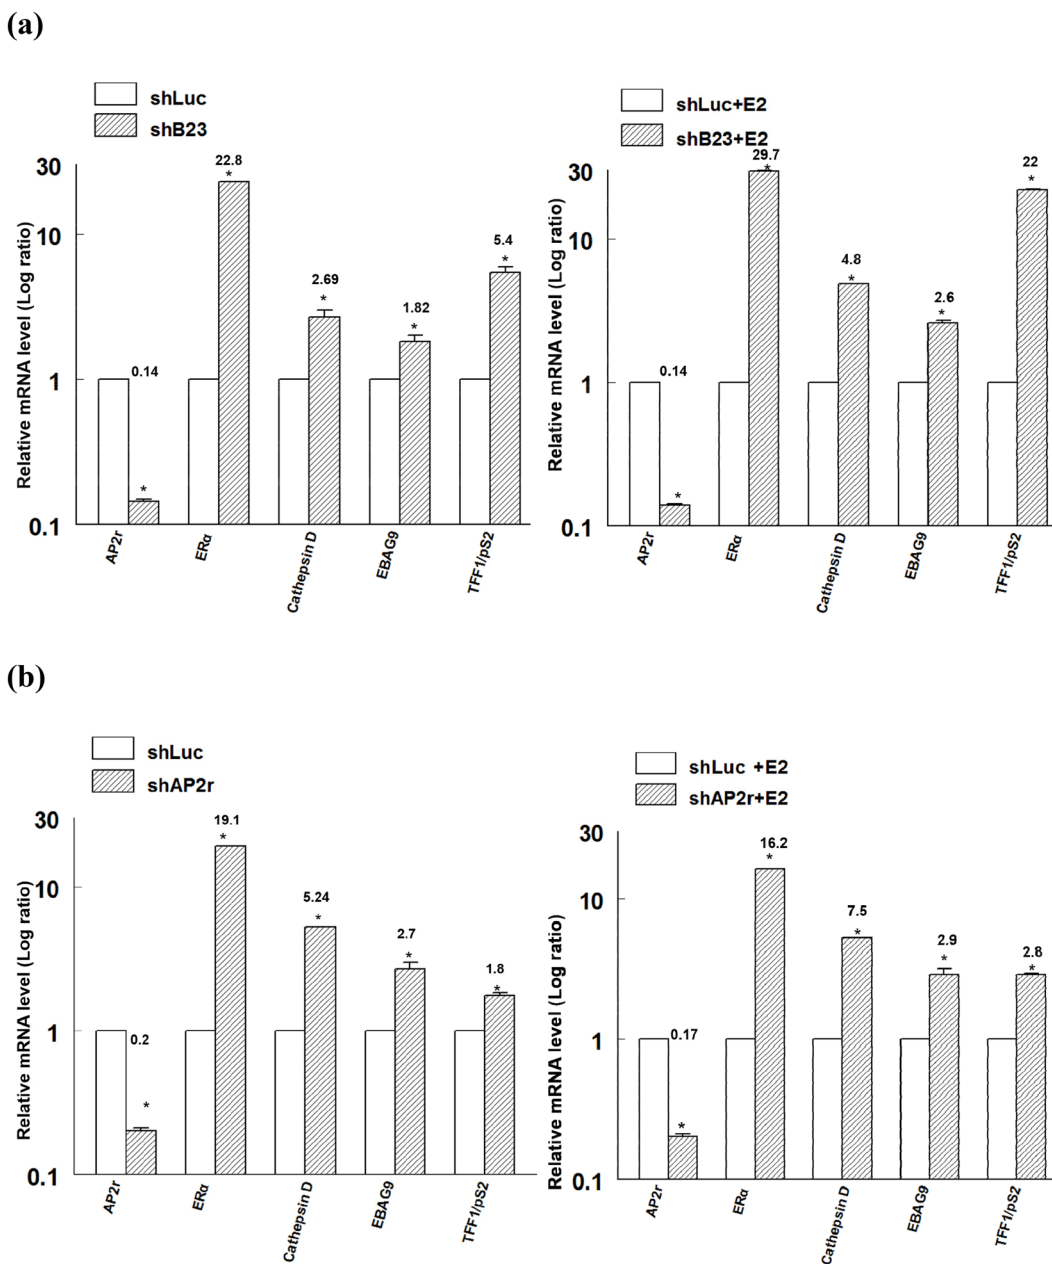

**Supplementary Figure S4: Knockdown B23 or AP2 $\gamma$  enhances sensitivity of the ER $\alpha$  downstream genes to estradiol treatment.** a, b. ARK2 cells were transiently transfected with shLuc or shB23 or shAP2 $\gamma$  for 48h and treated with/without 1 $\mu$ M E2 for additional 24h. The resulting RNAs of B23, AP2 $\gamma$ , ER $\alpha$ , cathepsin D, EBAG9, and TFF1/pS2 were analyzed with real-time qPCR using the designated primers. \* $P < 0.05$  compared with controls.

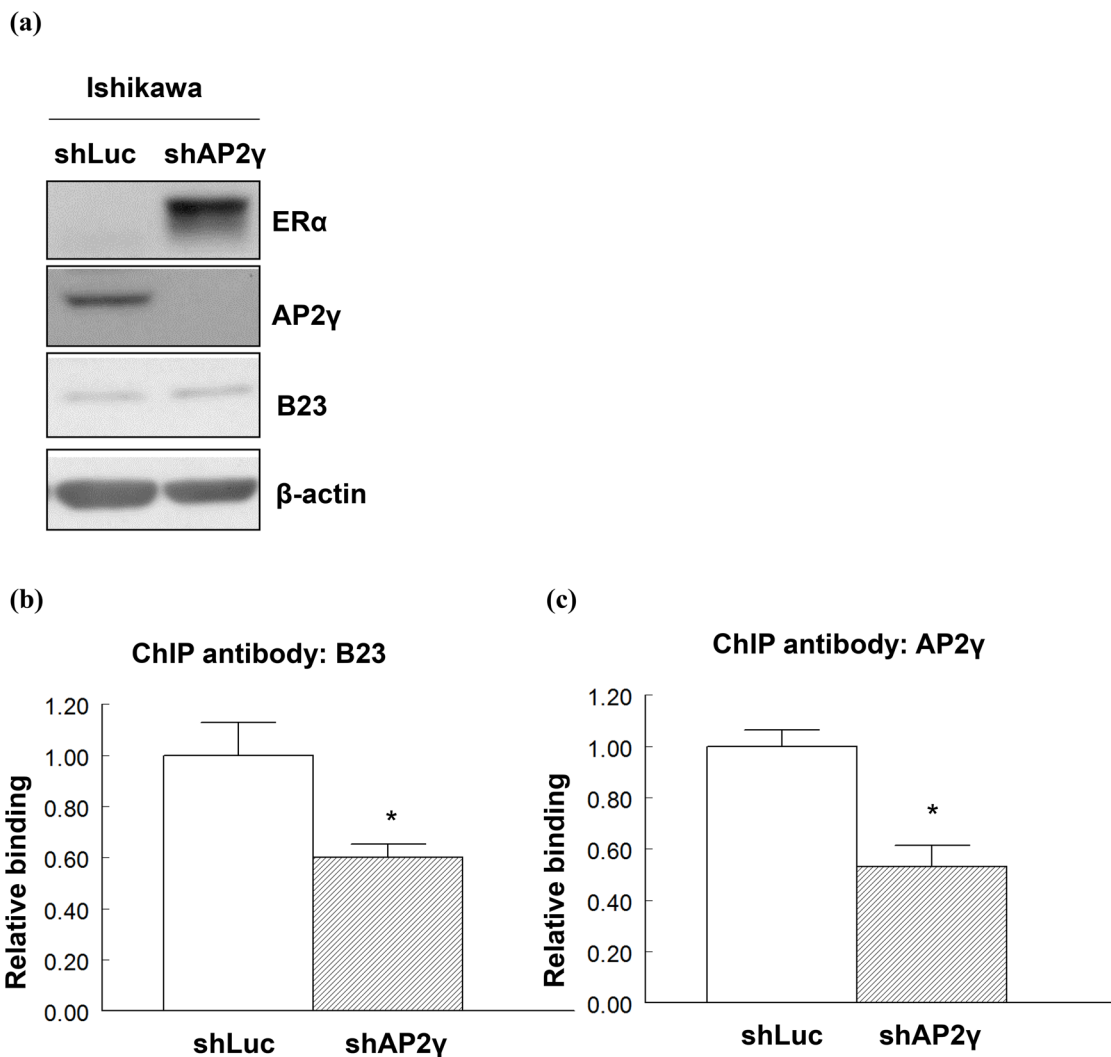

**Supplementary Figure S5: The AP2 $\gamma$  recognition site on ER $\alpha$  promoter is required for B23 binding.** a. After the isolation of stable knocked-down Ishikawa endometrial cancer cells, equal amounts of protein lysates were separated by SDS-PAGE and subjected to immunoblotting with antibodies raised against ER $\alpha$ , AP2 $\gamma$ , B23, and  $\beta$ -actin. The presence of an equal amount of proteins in each lane was confirmed with  $\beta$ -actin. b, c. Chromatin fragments were prepared from Ishikawa shLuc or shAP2 $\gamma$  stable clones for chromatin immunoprecipitation (ChIP) assays. Cell lysates were prepared and immunoprecipitated with control (IgG), anti-B23, and anti-AP2 $\gamma$  antibodies. The immunoprecipitated genomic regions were assayed with real-time qPCR using primers encompassing the AP2 $\gamma$  recognition sequence on the ER $\alpha$  promoter. Data are expressed as means  $\pm$  standard errors from three independent experiments. \*  $P < 0.05$  compared with controls.

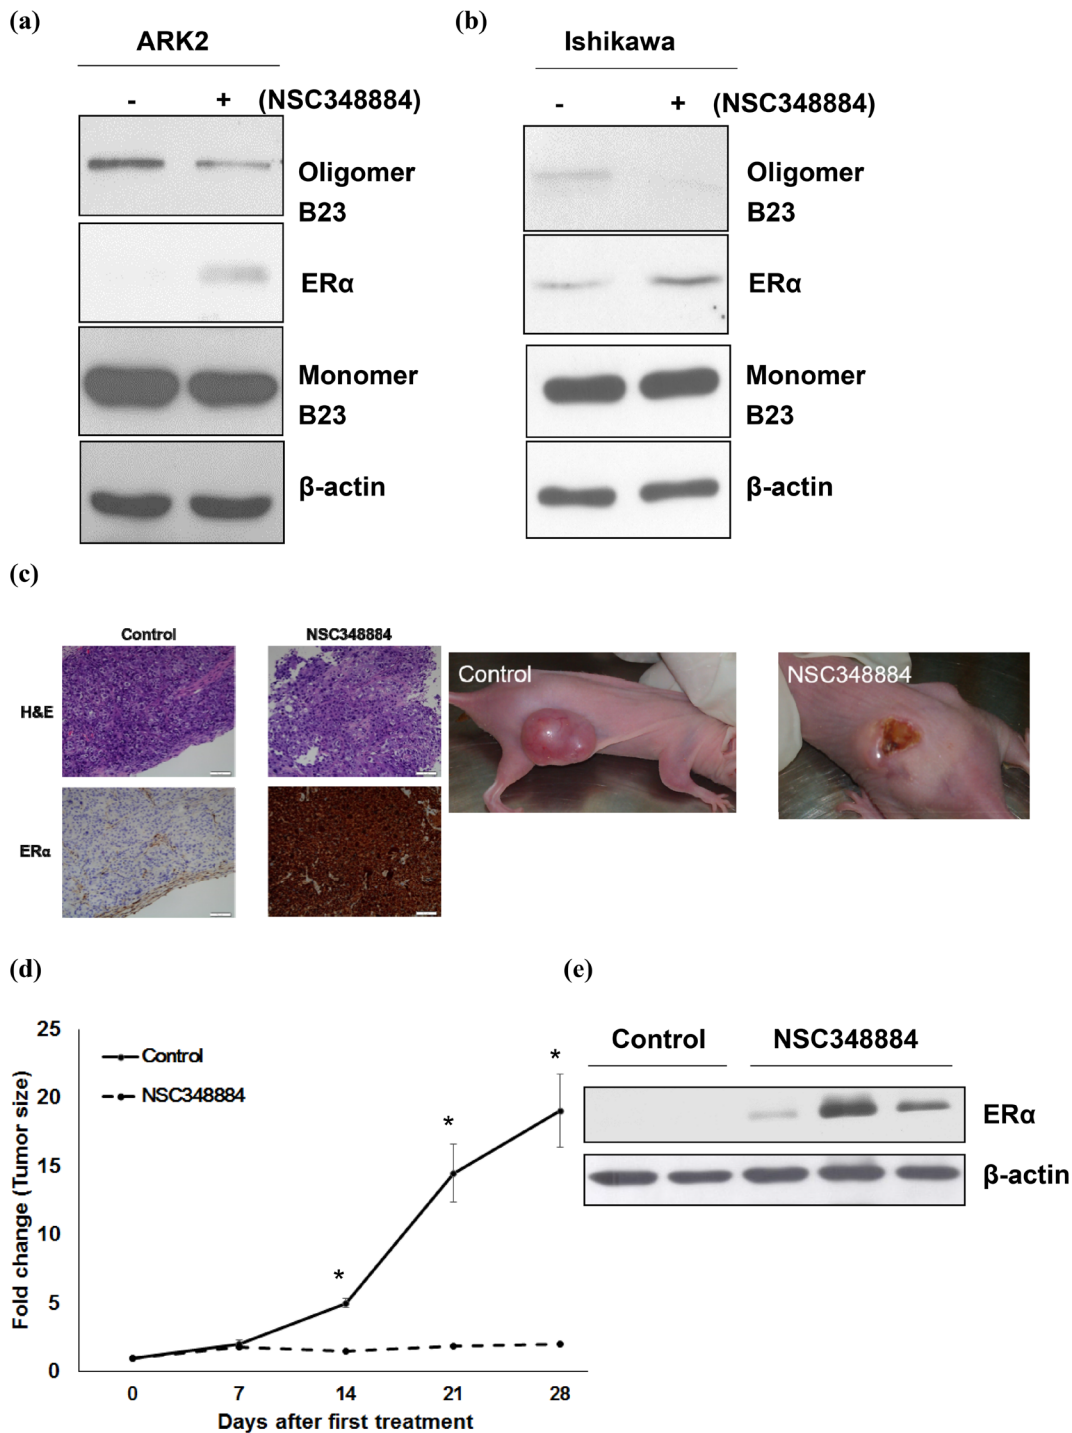

**Supplementary Figure S6: NSC348884 specifically disrupts the B23 oligomer and upregulates ERα expression.** **a, b.** ARK2 cells (left panel) and Ishikawa cells (right panel) were exposed to 2.5μM and 5μM of NSC348884 for 24 h. Subsequently, equal amounts of whole-cell extracts were immunoblotted with the reported antibodies. The presence of an equal amount of proteins in each lane was confirmed with β-actin. **(c-e)** ARK2 endometrial cancer cells were injected subcutaneously into the lateral hind leg of nude mice. Tumors were treated with subcutaneous injections of NSC348884 or a vehicle for 4 weeks. Tumor volumes (cm<sup>3</sup>) were measured on a weekly basis. \* *P* < 0.05 compared with the NSC348884 group. **c.** Formaldehyde-fixed tumors from mice were sectioned and stained with hematoxylin and eosin. In addition, immunohistochemistry with human ERα antibodies was performed (left panel). Photograph of tumors derived from NSC348884-treated or vehicle-treated tumor-bearing nude mice (right panel). **d.** Tumor growth curve in nude mice. **e.** Tumors treated with NSC348884 or the vehicle were immunoblotted with ERα antibodies. The presence of an equal amount of proteins in each lane was confirmed with β-actin.
